# Supplementary material for: Andrographolide Ameliorates Inflammation and Fibrogenesis and Attenuates Inflammasome Activation in Experimental Non-Alcoholic Steatohepatitis
Source: PubMed Central journal article supplement (PMC5471224; doi:10.1038/s41598-017-03675-z), 2017-06-14
Supplement: 41598_2017_3675_MOESM1_ESM.pdf [file 41598_2017_3675_MOESM1_ESM.pdf]

**SUPPLEMENTARY MATERIAL FOR:**

SREP-16-37389B

**ANDROGRAPHOLIDE AMELIORATES INFLAMMATION AND FIBROGENESIS  
AND ATTENUATES INFLAMMASOME ACTIVATION IN EXPERIMENTAL  
NON-ALCOHOLIC STEATOHEPATITIS**

Daniel Cabrera<sup>1,2</sup>, Alexander Wree<sup>3</sup>, Davide Povero<sup>3</sup>, Nancy Solís<sup>1</sup>, Alejandra Hernandez<sup>1</sup>, Margarita Pizarro<sup>1</sup>, Han Moshage<sup>4</sup>, Javiera Torres<sup>5</sup>, Ariel E. Feldstein<sup>3</sup>, Claudio Cabello-Verrugio<sup>6,7</sup>, Enrique Brandan<sup>8</sup>, Francisco Barrera<sup>1</sup>, Juan Pablo Arab<sup>1,9</sup> and Marco Arrese<sup>1,10\*</sup>

**Corresponding author:**

Marco Arrese, M.D.

Departamento de Gastroenterología

Escuela de Medicina

Pontificia Universidad Católica de Chile, Marcoleta #367, Santiago, Chile Postal code 6510260, Phone: 56-2-23543820, Fax: 56-2-26397780, e-mail:

[marrese@med.puc.cl](mailto:marrese@med.puc.cl)

| <b>Supplementary Table 1. Oligonucleotide primers and probes used for Real time-PCR</b> |                                |                                |                   |
|-----------------------------------------------------------------------------------------|--------------------------------|--------------------------------|-------------------|
| <b>mRNA</b>                                                                             | <b>Forward 5'-3'</b>           | <b>Reverse 5'-3'</b>           | <b>speci</b>      |
| 18S                                                                                     | CGGCTACCACATCCAAGGA            | CCAATTACAGGGCCTCGAAA           | Rattus Norvegicus |
| 18S                                                                                     | GCCGCTAGAGGTGAAATTCT           | TCGGAACTACGACGGTATCT           | Homo Sapiens      |
| Arg1                                                                                    | CTC CAA GCC AAA GTC CTT AGA G  | AGG AGC TGT CAT TAG GGA CAT C  | Mus Musculus      |
| ASC                                                                                     | CTT GTC AGG GGATGA ACT CAA AA  | GCC ATA CGA CTC CAG ATA GTA GC | Mus Musculus      |
| Casp1                                                                                   | ACA AGG CAC GGG ACC TAT G      | TCC CAG TCA GTC CTG GAA ATG    | Mus Musculus      |
| COL1A1                                                                                  | GCT CCT CTT AGG GGC CAC T      | CCA CGT CTC ACC ATT GGG G      | Mus Musculus      |
| COL1A1                                                                                  | TGGTGAACGTGGTGTACAAGGT         | CAGTATCACCCCTTGGCACCAT         | Rattus Norvegicus |
| CTGF                                                                                    | GGG CCT CTT CTG CGA TTT C      | ATC CAG GCA AGT GCA TTG GTA    | Mus Musculus      |
| F4/80                                                                                   | TGA CTC ACC TTG TGG TCC TAA    | CTT CCC AGA ATC CAG TCT TTC C  | Mus Musculus      |
| IL-1b                                                                                   | TGGCGAGCTCAGGTACTTCT           | GCTCTGGGATTCTCTTCAGCC          | Homo Sapiens      |
| iNOS                                                                                    | GTT CTC AGC CCA ACA ATA CAA GA | GTG GAC GGG TCG ATG TCA C      | Mus Musculus      |
| MCP1                                                                                    | TTA AAA ACC TGG ATC GGA ACC    | GCA TTA GCT TCA GAT TTA CGG GT | Mus Musculus      |
| MMP2                                                                                    | CAA GTT CCC CGG CGA TGT C      | TTC TGG TCA AGG TCA CCT GTC    | Mus Musculus      |
| pro-IL-1 $\beta$                                                                        | GAA ATG CCA CCT TTT GAC AGT G  | CTG GAT GCT CTC ATC AGG ACA    | Mus Musculus      |
| TGF- $\beta$                                                                            | GGGCTACCATGCCAACTTCTG          | GAGGGCAAGGACCTTGCTGTA          | Rattus Norvegicus |
| TIMP-1                                                                                  | CTT GGT TCC CTG GCG TAC TC     | ACC TGA TCC GTC CAC AAA CAG    | Mus Musculus      |
| TNF- $\alpha$                                                                           | CCC TCA CAC TCA GAT CAT CTT CT | GCT ACG ACG TGG GCT ACA G      | Mus Musculus      |
| $\alpha$ -SMA                                                                           | GTC CCA GAC ATC AGG GAG TAA    | TCG GAT ACT TCA GCG TCA GGA    | Mus Musculus      |
| $\alpha$ -SMA                                                                           | GCCAGTCGCCATCAGGAAC            | CACACCAGAGCTGTGCTGTCTT         | Rattus Norvegicus |
